# Supplementary material
Source: PubMed Central journal article supplement (PMC8556674)
Supplement: NIHMS1743398-supplement-Supplemental_Table_1.pdf [file NIHMS1743398-supplement-Supplemental_Table_1.pdf]

**Supplemental Table 1: Primers and plasmids used to generate the expression constructs for these studies**

| Primer Type | Insert plasmid                               | Destination plasmid                       | Modification to Destination plasmid                                                          | Final Plasmid                                            | Primer Sequence                                                                                                 |
|-------------|----------------------------------------------|-------------------------------------------|----------------------------------------------------------------------------------------------|----------------------------------------------------------|-----------------------------------------------------------------------------------------------------------------|
| Megaprimer  | myc-BioID2-MCS (Addgene #74223)              | pLKO.1-puro-CMV-TagRFP (Sigma #SHC012)    | Replacement of tRFP with myc-BioID2                                                          | URCF1 pLKO.1 myc-BioID2                                  | AGATCCGCTAGCGACGCCACCATGGAACAAAACTCATCTCAGAAGAGG<br>ATGGGGCCCCCGTTCTGCAGTCAGCGGTTAAACTTAAGCTTGGTACCGA           |
| Megaprimer  | GFP-CytoB5RR (Borgese)                       | URCF1 pLKO.1 myc-BioID2                   | Addition of linker between myc and BioID2<br>SGLRSRAQASNSDLEGGGSGGGSGGGGS                    | URChb4 pLKO.1 myc-linker-BioID2                          | ATGGAACAAAACTCATCTCAGAAGAGGATCTCTCCGGACTCAGATCTCGAGCTC<br>CTTCAGCCAGATCAGGTTCTTGAAGTCGGATCCGCCACCTCCAGATC       |
| Megaprimer  | GFP-MYO19 <sup>824-970</sup>                 | URChb4 pLKO.1 myc-linker-BioID2           | Insertion of MYO19 <sup>824-970</sup> between linker and BioID2                              | URCL5 pLKO.1 myc-linker-MYO19 <sup>824-970</sup> -BioID2 | TGGAACAAAACTCATCTCAGAAGAGGATCTCATGGCCTGCCTTGTCTGCTAAAGA<br>CTTGAGCTCGAGATCTGAGTCCGGACCCAGCCAGTGAAGGC            |
| Deletion    | n/a                                          | URO13 MYO19 <sup>866-970</sup> -EGFP      | Removal of MYO19 amino acids 866-897                                                         | URDS10 MYO19 <sup>898-970</sup> -EGFP                    | CTCGAGCTCAAGCTTATGAGTAGCTACACTGTCCAG<br>CTGGACAGTGTAGCTACTCATAAGCTTGAGCTCGAG                                    |
| Quickchange | n/a                                          | URDS10 MYO19 <sup>898-970</sup> -EGFP     | Mutation of well-conserved basic residues<br>in the MYO19 Miro-binding sequence              | UREM4 MYO19 <sup>898-970</sup> -EGFP K923A RK927-28AA    | GCTGCCTCAGGGATCGATAGCGTTTCACTGCGCAGCGTCTCCACTGCGGTATGC<br>GCATACCGCAGTGGAGACGCTGCGCAGTGAACGCTATCGATCCCTGAGGCAGC |
| Megaprimer  | mCherry-Lamina-C-18 (Addgene #55068)         | pRK5-myc-Miro2 (Addgene #47891)           | Addition of mcherry                                                                          | URDT12 mchr-Miro2                                        | ATCTCCGAGGAGGACCTGGGATCTATGGTGAAGGCGGAGGAG<br>GATGCGCACGTCCCGCCTCATGCTTCCGCTTCCGCCGG                            |
| Megaprimer  | mCherry-Lamina-C-18 (Addgene #55068)         | pRK5-myc-Miro2 T18N (Addgene #47897)      | Addition of mcherry                                                                          | URDU4 mchr-Miro2 T18N                                    | ATCTCCGAGGAGGACCTGGGATCTATGGTGAAGGCGGAGGAG<br>GATGCGCACGTCCCGCCTCATGCTTCCGCTTCCGCCGG                            |
| Megaprimer  | mCherry-Lamina-C-18 (Addgene #55068)         | pRK5-myc-Miro2 ΔTM(Addgene #47901)        | Addition of mcherry                                                                          | URDV3 mchr-Miro2 ΔTM                                     | ATCTCCGAGGAGGACCTGGGATCTATGGTGAAGGCGGAGGAG<br>GATGCGCACGTCCCGCCTCATGCTTCCGCTTCCGCCGG                            |
| Quickchange | n/a                                          | URDT12 mchr-Miro2                         | Mutation of amino acid A13 to V for GTP-bound<br>state                                       | URDW1 mchr-Miro2 A13V                                    | CTTCCCACCTGGACCTCGCCAGTAA<br>TTACTGGCGGAGGTCCAGGTGGGGAAG                                                        |
| Megaprimer  | EGFP-Syne2 (Luxton lab)                      | URDT12 mchr-Miro2                         | Swap of mitochondrial insertion sequence with KASH<br>domain to localize to nuclear membrane | UREL7 mchr-Miro2-KASH                                    | CCCTTCTCCTTCTGGCTCCGGATGCCACCTCGACAGCC<br>CAAGTTGGGCCATGGCGGCTATCTAGACTAGGTGGGAGGTGG                            |
| Megaprimer  | pcDNA3.1-MYO10-HMM-Nanotrap (Addgene #87255) | UREL7 mchr-Miro2-KASH                     | Swap of Miro2 for an anti-GFP nanobody                                                       | URFB5 mchr-Nanotrap <sup>green</sup> -KASH               | CATCCGGCGGAAGCGGAAGCAGATATCTGATGGCCAGGTTCAACT<br>GGCATCCGGAGCCAGAAGGAAGAACTTCCACCTTTAGAGCTCACCGTCACCTGAGT       |
| Quickchange | n/a                                          | URDT12 mchr-Miro2                         | Mutations to acidic residues in switch I of Miro2<br>N-terminal GTPase                       | URFF9 mchr-Miro2 switch I mut.                           | GGGAGGGACCGCCGCGGGAAACGCGCGCCACCAG<br>CTGGTGGCGCGGCGTTCCCGCGGCGGTCCCTCCC                                        |
| Quickchange | n/a                                          | URFF9 mchr-Miro2 switch I mut.            | Mutations to acidic residues in switch II of Miro2<br>N-terminal GTPase                      | URFJ75 mchr-Miro2 switch I & switch II mut.              | GACTACTCAGCAGCCGCGCAGACGGCCGCGGCTGCGGGAG<br>CTCCCGCAGCGCCGCGGCGTCTGCGCGGCTGCTGAGTAGTC                           |
| Megaprimer  | pGEX6P1-mCherry-Nanobody (Addgene #70696)    | pEGFP-C1 (Clontech)                       | Insertion of an anti-mcherry nanobody to the<br>C-terminus of GFP                            | URET3 GFP-Nanotrap <sup>red</sup>                        | CTGCAGTCGACGGTACCAGCATGGCACAGGTTTCACTGTTG<br>GTTATCTAGATCCGGTGGATCCCGGTTATGTAACGGGCTGCTAACGGTAAC                |
| Megaprimer  | pcDNA3.1-MYO10-HMM-Nanotrap (Addgene #87255) | pGEX6P1-mCherry-Nanobody (Addgene #70696) | Swap of anti-GFP nanobody for an anti-mcherry<br>nanobody (LaM4)                             | UREK2 MYO10-HMM-Nanotrap <sup>red</sup>                  | GAATCTGCAGATATCTGATGGCCAGATGGCACAGGTTTCACTGTTG<br>CTCTAGACTCGAGCGGCCGCTCATTTATGTAACGGGCTGCTAACGGTAAC            |
